# Supplementary material for: A search for extra-high brightness laser-driven color converters by investigating thermally-induced luminance saturation
Source: Royal Society of Chemistry journal article supplement (doi:10.1039/c9tc03919h), 2019-01-01
Supplement: c9tc03919h1.pdf [file c9tc03919h1.pdf]

## Electronic Supplementary Information

### Searching for extra-high brightness laser-driven color converters by investigating thermally-induced luminance saturation

Yirong Xu,<sup>a</sup> Shuxing Li,<sup>\*a</sup> Peng Zheng,<sup>a</sup> Le Wang,<sup>\*b</sup> Shihai You,<sup>a</sup> Takashi Takeda,<sup>c</sup> Naoto Hirosaki,<sup>c</sup> and Rong-Jun Xie<sup>\*a</sup>

<sup>a</sup> College of Materials, Xiamen University, Simingnan-Road 422, Xiamen 361005, P. R. China. E-mail: [rjxie@xmu.edu.cn](mailto:rjxie@xmu.edu.cn); [lishuxing@xmu.edu.cn](mailto:lishuxing@xmu.edu.cn).

<sup>b</sup> College of Optical and Electronic Technology, China Jiliang University, Hangzhou, Zhejiang 310018, China. E-mail: [calla@cjljlu.edu.cn](mailto:calla@cjljlu.edu.cn)

<sup>c</sup> Sialon Group, National Institute for Materials Science (NIMS), Tsukuba, Ibaraki 305-0035, Japan.

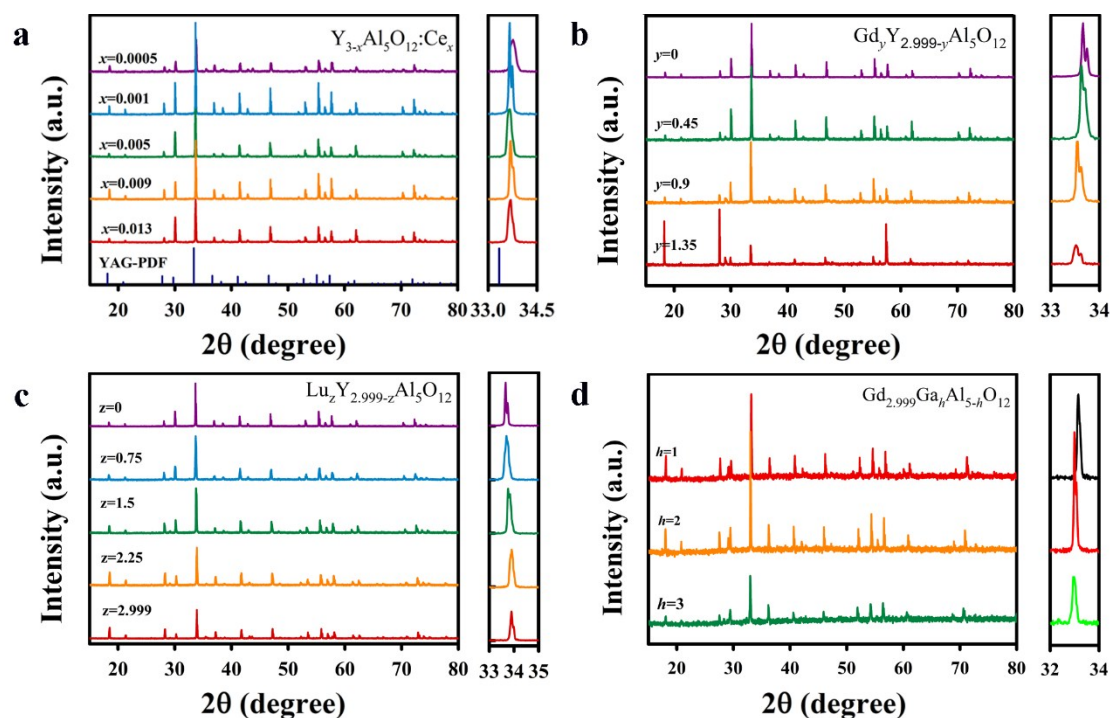

**Figure S1.** XRD patterns of (a)  $Y_{3-x}Al_5O_{12}:Ce_x$  ( $x = 0.0005 \sim 0.013$ ), (b)  $Gd_yY_{2.999-y}Al_5O_{12}:Ce_{0.001}$  ( $y = 0 \sim 1.3$ ), (c)  $Lu_zY_{2.999-z}Al_5O_{12}:Ce_{0.001}$  ( $z = 0 \sim 2.999$ ) and (d)  $Gd_{2.999}Al_{5-h}Ga_hO_{12}:Ce_{0.001}$  ( $h = 1 \sim 3$ ) ceramics.

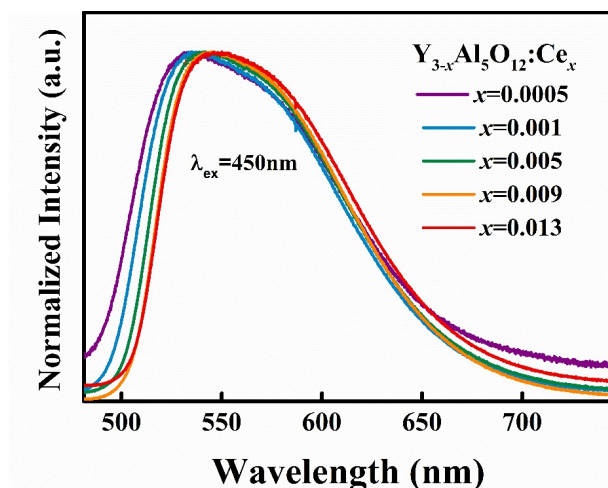

**Figure S2.** Normalized luminescence intensity *versus* the temperature of the YAG:Ce ceramics.

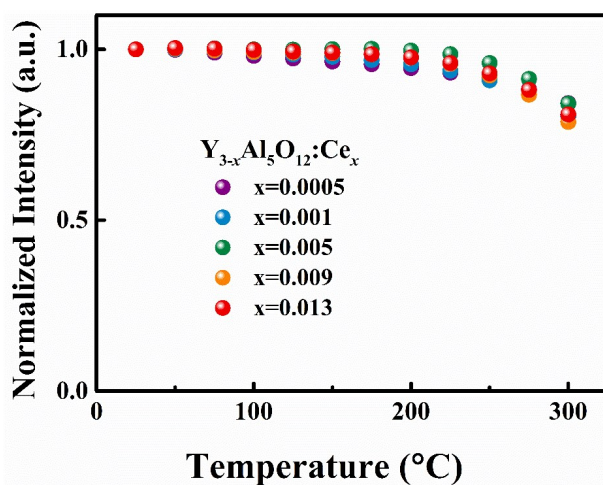

**Figure S3.** Normalized emission spectra of  $\text{Y}_{3-x}\text{Al}_5\text{O}_{12}:\text{Ce}_x$  ( $x = 0.0005 \sim 0.013$ ) ceramics ( $\lambda_{\text{ex}} = 450 \text{ nm}$ ).

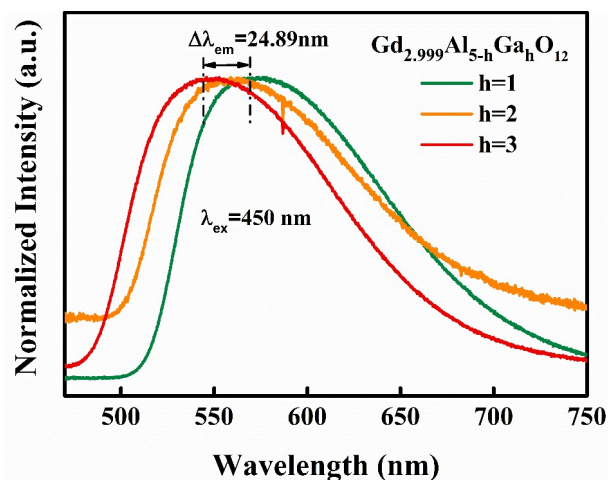

**Figure S4.** Normalized emission spectra of  $\text{Gd}_{2.999}\text{Al}_{5-h}\text{Ga}_h\text{O}_{12}:\text{Ce}_{0.001}$  ( $h = 1 \sim 3$ ) ceramics ( $\lambda_{\text{ex}} = 450 \text{ nm}$ ).

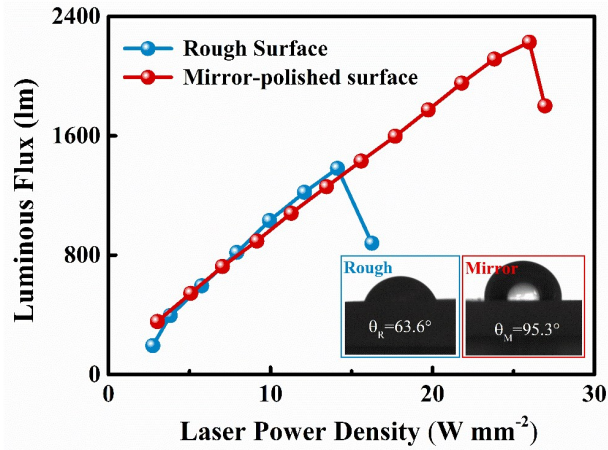

**Figure S5.** Thermal saturation evaluation for ceramics with different surface roughness. The insets show the corresponding contact angles.

**Table S1.** The relative densities ( $\rho_{\text{rel}}$ ) of the sintered ceramics.

| Samples      | $\rho_{\text{rel}}$ (%) |
|--------------|-------------------------|
| $x = 0.0005$ | 98.90                   |
| $x = 0.001$  | 98.12                   |
| $x = 0.005$  | 98.80                   |
| $x = 0.009$  | 99.12                   |
| $x = 0.013$  | 98.35                   |
| $y = 0.45$   | 98.68                   |
| $y = 0.9$    | 101.89                  |
| $y = 1.35$   | 100.08                  |
| $z = 0.75$   | 101.70                  |
| $z = 1.5$    | 99.20                   |
| $z = 2.25$   | 99.59                   |
| $z = 2.999$  | 99.94                   |
| $h = 1$      | 98.45                   |
| $h = 2$      | 98.67                   |
| $h = 3$      | 98.21                   |

**Video S1.** The disastrous crack happens to the ceramics when the power density increases beyond the saturation threshold.

**Video S2.** The increase in temperature under the excitation of saturation thresholds in a fairly short time for  $\text{Y}_{3-x}\text{Al}_5\text{O}_{12}:\text{Ce}_x$  ceramics: (a)  $x = 0.001$ , (b)  $x = 0.005$ , (c)  $x = 0.009$  and (d)  $x = 0.013$ .
